# Supplementary material
Source: Springer Nature journal article supplement (https://www.springermedizin.de/resource/supplementary/12958_2013_1151_MOESM4_ESM.pdf/9566920)

**A**

0hr

12hr

Control

OSM

Anti-gp130ab+OSM

**B**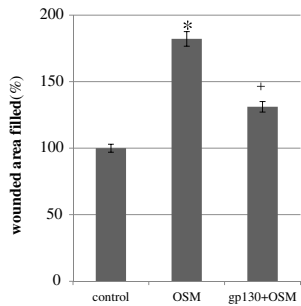

Supplement: MOESM4 [file 9566920]
